# Supplementary material
Source: PubMed Central journal article supplement (PMC6203651)
Supplement: NIHMS1507315-supplement-1.pdf [file NIHMS1507315-supplement-1.pdf]

Supplementary Figures for:

## **$\alpha$ -synuclein expression from a single copy transgene increases sensitivity to stress and accelerates neuronal loss in genetic models of Parkinson's disease**

Jason F. Cooper<sup>1</sup>, Katie K. Spielbauer<sup>1</sup>, Megan M. Senchuk<sup>1</sup>, Saravanapriah Nadarajan<sup>2</sup>, Monica P Colaiácovo<sup>2</sup>, Jeremy M. Van Raamsdonk<sup>1,2,3,4</sup>

<sup>1</sup>Laboratory of Aging and Neurodegenerative Disease, Center for Neurodegenerative Science, Van Andel Research Institute, Grand Rapids MI 49503, USA

<sup>2</sup>Department of Genetics, Harvard Medical School, Boston MA 02115, USA

<sup>3</sup>Department of Neurology and Neurosurgery, McGill University, Montreal, Quebec, H3A 2B4, Canada

<sup>4</sup>Metabolic Disorders and Complications Program, and Brain Repair and Integrative Neuroscience Program, Research Institute of the McGill University Health Centre, Montreal, Quebec, H4A 3J1, Canada

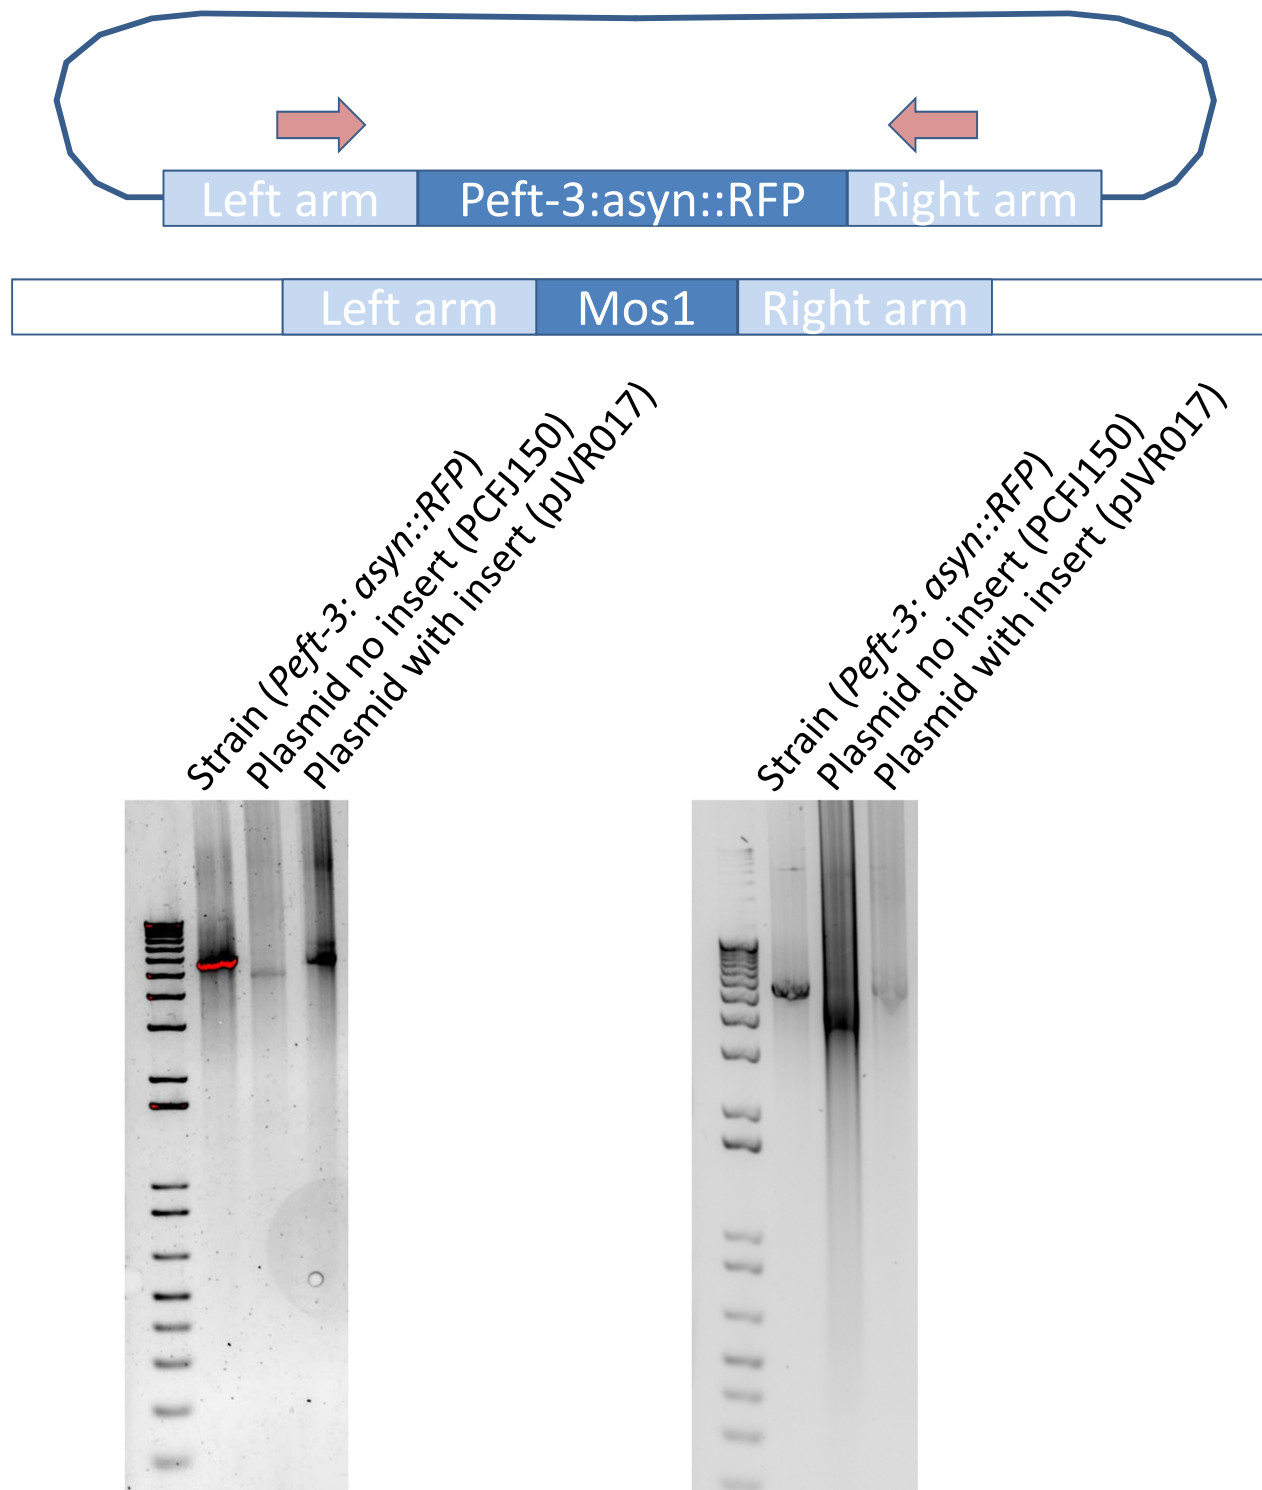

**Fig. S1. A single copy of  $\alpha$ -synuclein transgene is present in ubiquitously expressing  $\alpha$ -synuclein model. A.** Diagram of MosSCI (Mos1-mediated single copy insertion) approach. The *mos-1* gene present in the genomic DNA is replaced with the genetic material between the left and right arms, in this case the *Peft-3::asyn:RFP* transgene (and *unc-119* rescue construct). Red arrows indicate the location of primers. **B.** Amplification of *Mos1* region in *Peft-3::asyn:RFP* worm produces a band which is identical to amplification of the original plasmid DNA (pJVR017). The size of this fragment is larger than the plasmid without the *Peft-3::asyn:RFP* transgene integrated (PCFJ150). This confirms that the *asyn:RFP* was inserted as a single copy transgene.

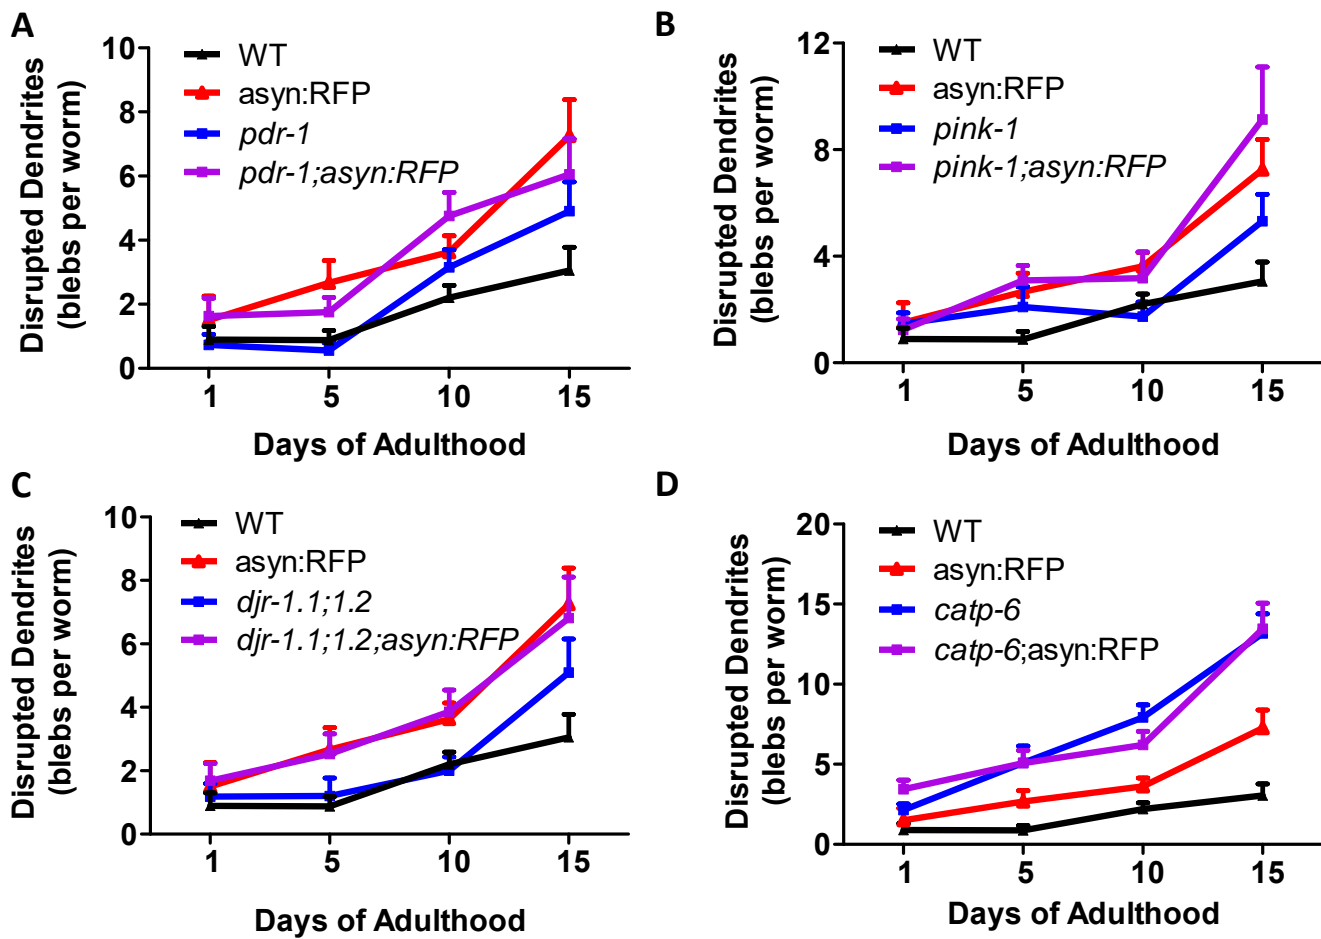

**Fig. S2.  $\alpha$ -synuclein expression increases neuronal blebbing independent of strain background.** The addition of *asyn::RFP* increases dendritic blebbing compared to control in *pdr-1* (A), *pink-1* (B), and *djr-1.1* (C) animals but does not further increase blebbing in *catp-6* worms (D). Error bars indicate SEM.

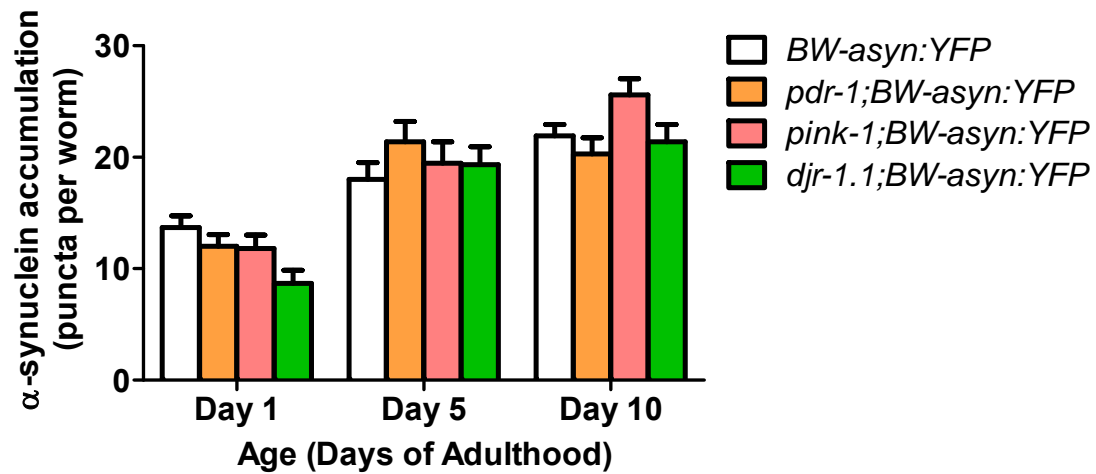

**Fig. S3. Mutations in *pdr-1*, *pink-1* and *djr-1.1* do not accelerate aggregation in BW-asyn:YFP worms.** Fluorescent puncta were quantified using an automated image analysis protocol. *Punc-54:: $\alpha$ -syn:YFP* worms are indicated as BW-asyn:YFP. Error bars indicate SEM. \* $p < 0.05$ , \*\* $p < 0.01$ , \*\*\* $p < 0.001$ .
